# Supplementary material for: CTXA Hip—An Extension of Classical DXA Measurements Using Quantitative CT
Source: PLoS One. 2014 Mar 17;9(3):e91904. doi: 10.1371/journal.pone.0091904 (PMC3956816; doi:10.1371/journal.pone.0091904)
Supplement: Table S1 — Long Term In Vivo Precision CTXA vs DXA - Data. (XLSX) [file pone.0091904.s001.xlsx]

## Sheet: Sheet1
	Long-Term In Vivo Precision, CTXA vs. DXA
		bmd Total CTXA	bmd Total DXA		bmd FemNeck CTXA	bmd FemNeck DXA
	Year
	0	0.634	0.6732		0.533	0.5643
	1	0.621	0.6778		0.533	0.5627
	2	0.607	0.6686		0.529	0.5582
	0	0.6	0.6082		0.54	0.5008
	1	0.592	0.6171		0.519	0.5223
	2	0.597	0.6087		0.52	0.507
	0	0.633	0.6964		0.533	0.6715
	1	0.642	0.7159		0.549	0.663
	2	0.645	0.7199		0.554	0.6496
	0	0.637	0.6446		0.621	0.6726
	1	0.626	0.6573		0.598	0.6551
	2	0.625	0.6584		0.605	0.6719
	0	0.503	0.6788		0.502	0.5625
	1	0.496	0.6895		0.496	0.5943
	2	0.489	0.7145		0.48	0.664
	0	0.674	0.7916		0.585	0.6626
	1	0.673	0.7779		0.585	0.6384
	2	0.666	0.7903		0.565	0.6509
	0	0.654	0.7285		0.58	0.6205
	1	0.641	0.7356		0.565	0.6403
	2	0.667	0.7327		0.561	0.63
	0	0.66	0.7363		0.504	0.5839
	1	0.677	0.7477		0.53	0.5755
	2	0.672	0.7532		0.523	0.5841
	0	0.689	0.7599		0.618	0.6735
	1	0.699	0.7257		0.629	0.6737
	2	0.691	0.7565		0.622	0.7042
	0	0.6	0.6445		0.531	0.4971
	1	0.61	0.6488		0.538	0.5154
	2	0.612	0.6837		0.559	0.5369
	0	0.636	0.6807		0.559	0.61
	1	0.651	0.686		0.572	0.6186
	2	0.667	0.7009		0.578	0.648
	0	0.667	0.6731		0.546	0.5262
	1	0.662	0.6719		0.559	0.5223
	2	0.671	0.6705		0.547	0.5203
	0	0.854	0.863		0.72	0.7141
	1	0.841	0.8672		0.71	0.7231
	2	0.85	0.8574		0.718	0.721
	0	0.662	0.6753		0.483	0.566
	1	0.662	0.686		0.491	0.5731
	2	0.662	0.6992		0.486	0.5612
	0	0.747	0.7312		0.576	0.588
	1	0.736	0.7801		0.577	0.5874
	2	0.787	0.7975		0.602	0.6159
	0	0.633	0.6633		0.563	0.5901
	1	0.627	0.6639		0.55	0.5961
	2	0.654	0.659		0.576	0.6074
	0	0.56	0.6414		0.49	0.5512
	1	0.541	0.6745		0.475	0.5369
	2	0.543	0.6619		0.483	0.5345
	0	0.569	0.6944		0.576	0.6544
	1	0.564	0.686		0.56	0.6291
	2	0.58	0.6883		0.58	0.6421
	0	0.608	0.582		0.522	0.527
	1	0.604	0.5943		0.521	0.5182
	2	0.561	0.6152		0.482	0.5232
	0	0.513	0.5477		0.427	0.4565
	1	0.498	0.569		0.415	0.4721
	2	0.507	0.5636		0.42	0.4769
	0	0.748	0.7495		0.579	0.652
	1	0.744	0.7729		0.59	0.6577
	2	0.756	0.7497		0.573	0.6206
	0	0.757	0.7754		0.606	0.6197
	1	0.763	0.7624		0.606	0.6325
	2	0.742	0.8025		0.597	0.6399
